# Supplementary material for: Development of a Customizable Programme for Improving Interprofessional Team Meetings: An Action Research Approach
Source: PubMed Central journal article supplement (PMC5887069; doi:10.5334/ijic.3076), 2018-01-25
Supplement: ijic-18-1-3076-s2.pdf [file ijic-18-1-3076-s2.pdf]

## Additional file 2: Observation guide

|                                                      |                                                                                                                                                                                                                                                                                                                                                                                                                                                                                                                                                                                                                                                                                                               |                                                                                                                                                                                                                                                                                                                                                                                                                                |
|------------------------------------------------------|---------------------------------------------------------------------------------------------------------------------------------------------------------------------------------------------------------------------------------------------------------------------------------------------------------------------------------------------------------------------------------------------------------------------------------------------------------------------------------------------------------------------------------------------------------------------------------------------------------------------------------------------------------------------------------------------------------------|--------------------------------------------------------------------------------------------------------------------------------------------------------------------------------------------------------------------------------------------------------------------------------------------------------------------------------------------------------------------------------------------------------------------------------|
| <p><b>Observation list</b></p> <p><b>Overall</b></p> | <p><b>Is the programme (core component / tool) being applied, and if so, which parts?</b></p> <p><i>How (and to what extent) are the different components and tools of the programme being applied?</i></p>                                                                                                                                                                                                                                                                                                                                                                                                                                                                                                   | <p><b>Manageability and feasibility</b><br/><i>What do you notice about the feasibility of the programme?</i></p> <p><b>Bottlenecks</b><br/><i>What are the evident bottlenecks?</i></p> <p><b>Contextual factors</b><br/><i>Which visible contextual factors are influencing the application of the programme?</i></p> <p><b>Added value</b><br/><i>What can you say about the added value provided by the programme?</i></p> |
| <p><b>Knowing each other</b></p>                     | <ul style="list-style-type: none"> <li>○ Team members know each other (No one has to be introduced, no new faces)</li> </ul>                                                                                                                                                                                                                                                                                                                                                                                                                                                                                                                                                                                  |                                                                                                                                                                                                                                                                                                                                                                                                                                |
| <p><b>Rules for the meeting</b></p>                  | <ul style="list-style-type: none"> <li>○ Everyone visibly adheres to the agreements and rules for the meeting</li> <li>○ Team members stick to the organizational agreements</li> </ul>                                                                                                                                                                                                                                                                                                                                                                                                                                                                                                                       |                                                                                                                                                                                                                                                                                                                                                                                                                                |
| <p><b>Roles</b></p>                                  | <ul style="list-style-type: none"> <li>○ <b><u>Chairperson:</u></b></li> <li>○ Has prepared the meeting</li> <li>○ Structures the meeting</li> <li>○ Ensures adherence to the rules of the meeting</li> <li>○ Follows the six-step plan</li> <li>○ Summarizes</li> <li>○ Keeps track of time</li> <li>○ Guides reflection</li> <li>○ Points out tensions</li> <li>○ Clearly announces closing the meeting and plans next meeting</li> <br/> <li>○ <b><u>Secretary:</u></b></li> <li>○ Takes care of the reporting (preparing minutes)</li> <li>○ Checks regularly whether minutes correspond to what has been agreed on during discussion</li> <li>○ Where appropriate, refers to previous minutes</li> </ul> |                                                                                                                                                                                                                                                                                                                                                                                                                                |
| <p><b>Interprofessional meeting structure</b></p>    | <ul style="list-style-type: none"> <li>○ <b><u>Preparation</u></b></li> <li>○ Clear agenda</li> <li>○ Information about patients is provided before the meeting</li> <br/> <li>○ <b><u>Meeting</u></b></li> <li>○ Opening</li> <li>○ Discussion of each patient</li> <li>○ Closing</li> <br/> <li>○ <b><u>Aftercare</u></b></li> <li>○ Reporting</li> <li>○ Agreements regarding feedback to patient</li> <li>○ Agenda and agreements for next meeting</li> </ul>                                                                                                                                                                                                                                             |                                                                                                                                                                                                                                                                                                                                                                                                                                |
| <p><b>Interaction and team climate</b></p>           | <ul style="list-style-type: none"> <li>○ <b><u>Team members give each other feedback</u></b></li> <li>○ On content</li> <li>○ On procedure</li> <li>○ On interaction</li> </ul> <p><b>Any comments about the team climate and atmosphere?</b></p> <p><b>Are there any visible irritations?</b></p> <p><b>Any comments about the way the team talks about patients?</b></p>                                                                                                                                                                                                                                                                                                                                    |                                                                                                                                                                                                                                                                                                                                                                                                                                |
| <p><b>Reflection tool</b></p>                        | <p><b><u>At which level does the team reflect?</u></b></p> <ul style="list-style-type: none"> <li>○ Is there any input from participants?</li> <li>○ Are specific learning objectives defined?</li> <li>○ Does the team refer back to previous agreements and learning objectives?</li> </ul>                                                                                                                                                                                                                                                                                                                                                                                                                 |                                                                                                                                                                                                                                                                                                                                                                                                                                |

|                                                          |                                                                                                                                                                                                                                                                                                                                                                                                                                                                                    |                                                                                                                                                                                                                                                                                                                                                                                                                              |
|----------------------------------------------------------|------------------------------------------------------------------------------------------------------------------------------------------------------------------------------------------------------------------------------------------------------------------------------------------------------------------------------------------------------------------------------------------------------------------------------------------------------------------------------------|------------------------------------------------------------------------------------------------------------------------------------------------------------------------------------------------------------------------------------------------------------------------------------------------------------------------------------------------------------------------------------------------------------------------------|
| <p><b>Observation list</b></p> <p><b>Per patient</b></p> | <p><b>Is the programme (core component / tool) being applied, and if so, what parts?</b></p> <p><i>How (and to what extent) are the different parts and tools of the programme applied?</i></p>                                                                                                                                                                                                                                                                                    | <p><b>Manageability and feasibility</b><br/><i>What can you say about the feasibility of the programme?</i></p> <p><b>Bottlenecks</b><br/><i>What are the evident bottlenecks?</i></p> <p><b>Contextual factors</b><br/><i>Which visible contextual factors are influencing the application of the programme?</i></p> <p><b>Added value</b><br/><i>What can you say about the added value provided by the programme?</i></p> |
| <p><b>Roles</b></p>                                      | <p><b>Presenter:</b></p> <ul style="list-style-type: none"> <li>○ Gives a clear description of the patient's background and situation</li> <li>○ Presents the patient's personal goals and wishes</li> <li>○ Presents an explicit question for the team</li> <li>○ Follows the six-step plan</li> </ul> <p><b>Participants:</b></p> <ul style="list-style-type: none"> <li>○ Active participation</li> <li>○ Clearly prepared (do not ask questions that are redundant)</li> </ul> |                                                                                                                                                                                                                                                                                                                                                                                                                              |
| <p><b>Preparation</b></p>                                | <ul style="list-style-type: none"> <li>○ Presenter has filled in the form correctly and completely (there are no questions or uncertainties)</li> <li>○ The form has been submitted on time and according to the agreed rules</li> </ul>                                                                                                                                                                                                                                           |                                                                                                                                                                                                                                                                                                                                                                                                                              |
| <p><b>Six-step plan</b></p>                              | <ul style="list-style-type: none"> <li>○ Description of the patient's situation</li> <li>○ Patient's goals and motivation</li> <li>○ Analysis</li> <li>○ Formulating concrete proposals for action</li> <li>○ Formulating concrete care agreements</li> <li>○ Evaluation</li> </ul>                                                                                                                                                                                                |                                                                                                                                                                                                                                                                                                                                                                                                                              |
